# Supplementary material for: Enhanced Statistical Tests for GWAS in Admixed Populations: Assessment using African Americans from CARe and a Breast Cancer Consortium
Source: PubMed Central journal article supplement (PMC3080860; doi:10.1371/journal.pgen.1001371), 2011-04-21

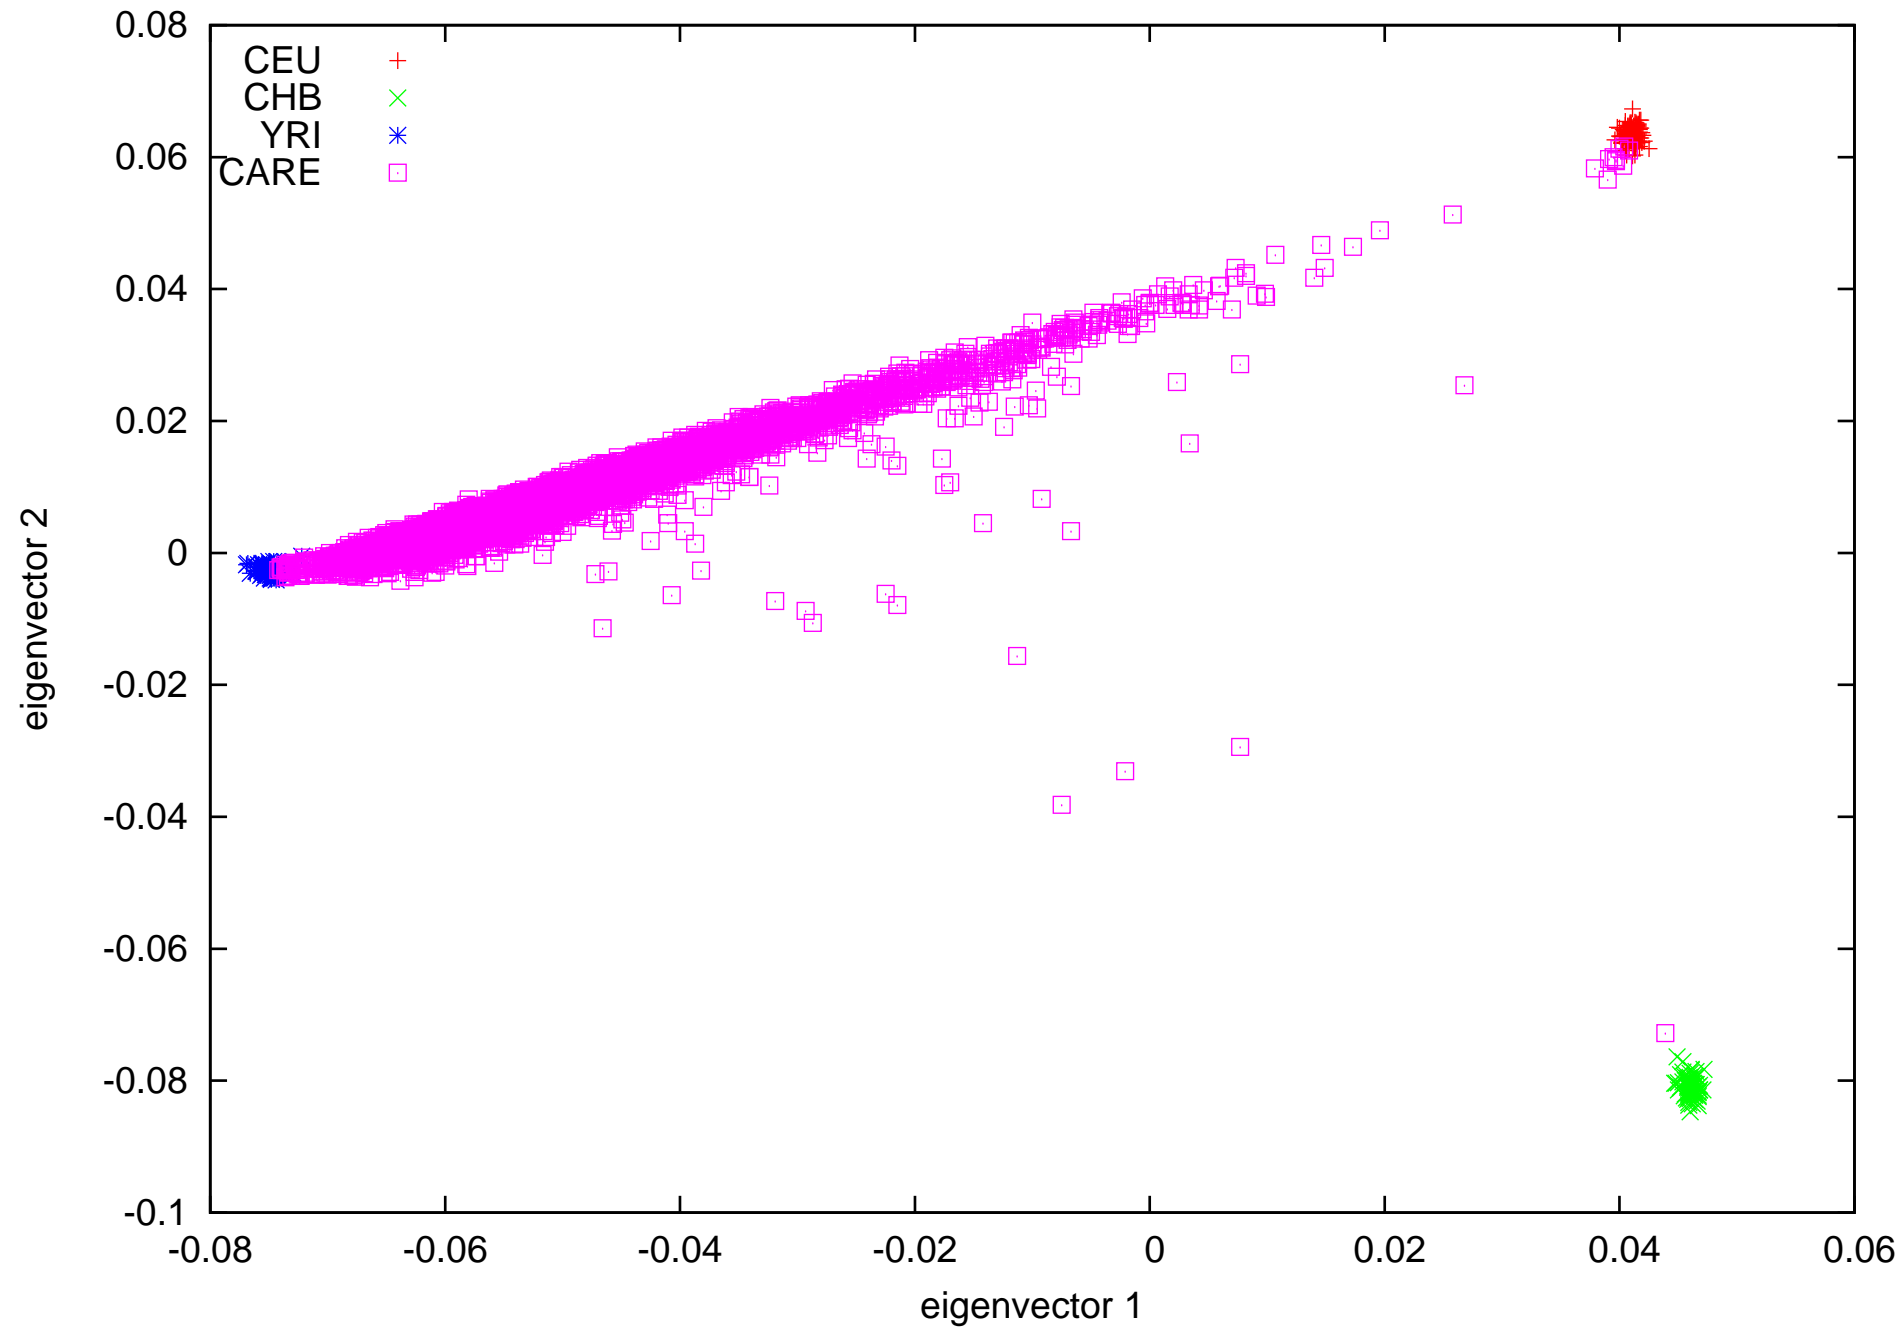

Supplement: pgen.1001371.s001.pdf [file pgen.1001371.s001.pdf]
